# Supplementary material for: Predicting Response to Total Neoadjuvant Treatment (TNT) in Locally Advanced Rectal Cancer Based on Multiparametric Magnetic Resonance Imaging: A Retrospective Study
Source: Research Square preprint supplement (doi:10.21203/rs.3.rs-120616/v1), 2020-12-08
Supplement: Supplementary file 1 [file f303868164cec20c813f423d.docx]

**Supplementary table 1** Post - ICT MRI parameters.

|  |  | CR | Non - CR |  | H group | M group |
| --- | --- | --- | --- | --- | --- | --- |
| Parameters |  | N = 5 | N = 10 |  | N = 8 | N = 5 |
| Post - ICT ∆TL (%) |  | 33 (17 - 39) | 4 (-5 - 27) |  | 22 ± 13 | 5 ± 3 |
| Post - ICT ∆LND (%) |  | 29 (22 - 100) | 0 (-14 - 50) |  | 29 ± 32 | 10 ± 20 |
| Post - ICT ∆LNV (%) |  | 59 (38 - 47) | 15.5 (-127 - 77) |  | 40 ± 25 | -1 ± 68 |

**Abbreviations** ICT, induction chemotherapy; TL, tumor length; LND, diameter of lymph node; LNV, volume of lymph node on T2 – weight.
